# Supplementary material for: Sea ice cover in the Copernicus Arctic Regional Reanalysis
Source: Copernicus journal article supplement (doi:10.5194/tc-2023-74), 2023-06-14
Supplement: Supplementary file 1 [file tc-2023-74-supplement.pdf]

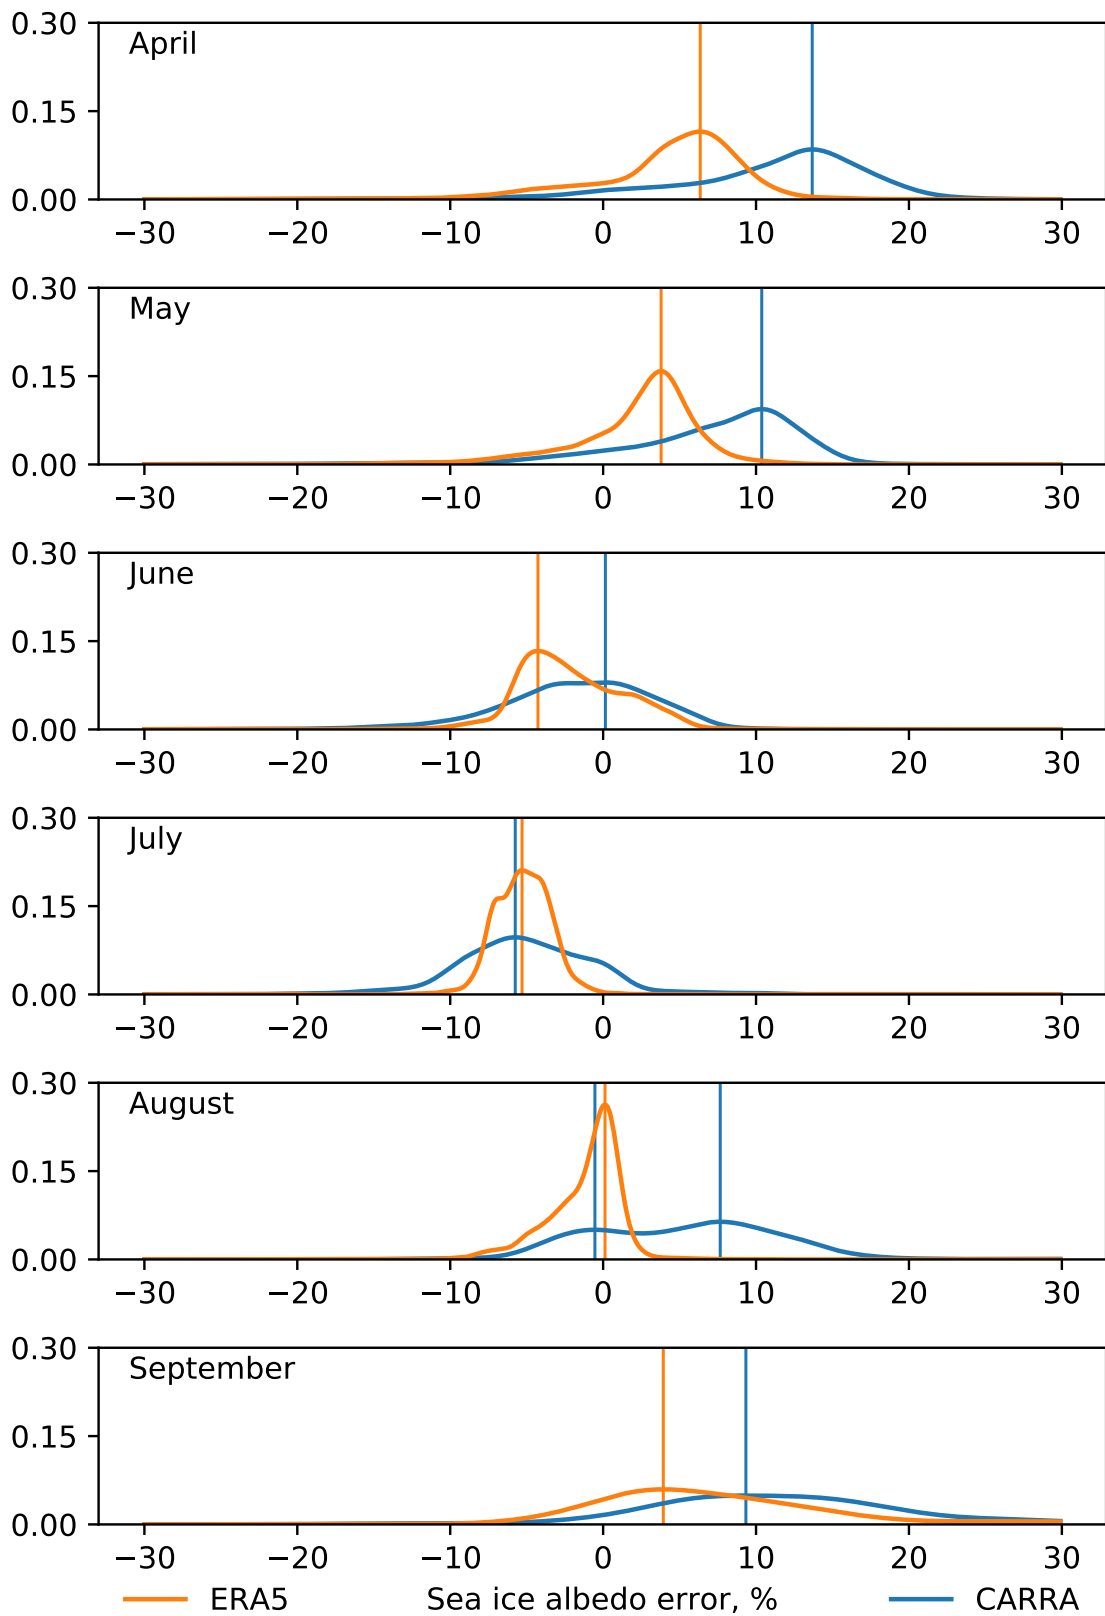

Figure S1: Estimated probability density functions (PDF) of the errors in the modelled sea ice albedo in CARRA and ERA5 reanalysis products. Errors are computed against the CLARA-A2 satellite product over a time period from 2000 to 2015. Also one the panels, modes of the error PDFs are marked. On the panels:  $x$ -axis – sea ice albedo error;  $y$ -axis – density.

Table S1: Estimated monthly quantiles of the sea ice surface temperature in CARRA and ERA5, as well as in the MODIS sea ice surface temperature product. Quantiles are computed for the period from 2000 to 2020.

|     |                 | Ice surface temperature quantile $Q_q$ , °C |        |        |        |        |        |        |        |        |        |       |
|-----|-----------------|---------------------------------------------|--------|--------|--------|--------|--------|--------|--------|--------|--------|-------|
| $q$ |                 | 0.01                                        | 0.1    | 0.2    | 0.3    | 0.4    | 0.5    | 0.6    | 0.7    | 0.8    | 0.9    | 0.99  |
| Jan | MO <sup>1</sup> | -44.82                                      | -37.94 | -34.53 | -31.79 | -29.16 | -26.49 | -23.89 | -21.15 | -17.84 | -13.19 | -3.90 |
|     | CA <sup>2</sup> | -42.11                                      | -34.90 | -31.43 | -28.91 | -26.74 | -24.68 | -22.65 | -20.38 | -17.28 | -12.34 | -3.04 |
|     | E5 <sup>3</sup> | -35.78                                      | -30.94 | -28.25 | -26.13 | -24.24 | -22.50 | -20.63 | -18.41 | -15.52 | -11.03 | -3.18 |
| Feb | MO              | -46.06                                      | -38.16 | -34.17 | -31.26 | -28.49 | -25.79 | -23.15 | -20.28 | -16.67 | -11.60 | -3.42 |
|     | CA              | -42.66                                      | -35.85 | -32.13 | -29.32 | -27.07 | -24.97 | -22.63 | -19.74 | -16.09 | -10.69 | -2.66 |
|     | E5              | -36.56                                      | -31.07 | -28.19 | -25.94 | -23.99 | -22.14 | -20.10 | -17.52 | -14.14 | -9.50  | -2.87 |
| Mar | MO              | -45.47                                      | -36.92 | -33.06 | -30.07 | -27.26 | -24.69 | -22.18 | -19.59 | -16.66 | -12.53 | -3.90 |
|     | CA              | -42.44                                      | -34.03 | -30.46 | -28.00 | -25.94 | -23.95 | -21.86 | -19.58 | -16.75 | -12.36 | -3.38 |
|     | E5              | -35.77                                      | -29.25 | -26.40 | -24.31 | -22.53 | -20.87 | -19.14 | -17.21 | -14.76 | -10.93 | -3.36 |
| Apr | MO              | -37.53                                      | -30.20 | -26.53 | -23.91 | -21.63 | -19.50 | -17.32 | -14.96 | -12.34 | -8.67  | -2.73 |
|     | CA              | -33.51                                      | -26.52 | -23.64 | -21.55 | -19.73 | -18.01 | -16.28 | -14.45 | -12.10 | -8.63  | -1.89 |
|     | E5              | -27.78                                      | -22.42 | -20.04 | -18.27 | -16.79 | -15.43 | -14.05 | -12.51 | -10.59 | -7.76  | -2.27 |
| May | MO              | -24.29                                      | -18.35 | -15.51 | -13.46 | -11.72 | -9.93  | -8.17  | -6.41  | -4.65  | -2.92  | -0.96 |
|     | CA              | -20.69                                      | -15.24 | -12.94 | -11.18 | -9.57  | -8.06  | -6.53  | -4.96  | -3.37  | -1.66  | -0.02 |
|     | E5              | -16.43                                      | -12.51 | -10.67 | -9.2   | -7.91  | -6.73  | -5.49  | -4.25  | -3.01  | -1.61  | 0.51  |
| Jun | MO              | -11.04                                      | -6.32  | -4.52  | -3.39  | -2.61  | -2.04  | -1.57  | -1.18  | -0.83  | -0.50  | -0.21 |
|     | CA              | -8.01                                       | -3.28  | -1.59  | -0.83  | -0.52  | -0.33  | -0.20  | -0.12  | -0.03  | 0.01   | 0.83  |
|     | E5              | -4.43                                       | -1.84  | -0.95  | -0.44  | -0.07  | 0.22   | 0.48   | 0.75   | 1.05   | 1.45   | 3.34  |
| Jul | MO              | -5.36                                       | -2.45  | -1.78  | -1.36  | -1.06  | -0.83  | -0.66  | -0.51  | -0.40  | -0.29  | -0.17 |
|     | CA              | -1.58                                       | -0.88  | -0.64  | -0.47  | -0.37  | -0.30  | -0.25  | -0.21  | -0.18  | -0.04  | 1.07  |
|     | E5              | -1.57                                       | -0.32  | 0.12   | 0.40   | 0.62   | 0.83   | 1.06   | 1.31   | 1.58   | 2.01   | 6.53  |
| Aug | MO              | -12.82                                      | -6.79  | -4.64  | -3.42  | -2.60  | -2.02  | -1.56  | -1.17  | -0.83  | -0.51  | -0.22 |
|     | CA              | -8.40                                       | -4.06  | -2.12  | -1.43  | -1.06  | -0.76  | -0.48  | -0.30  | -0.22  | -0.18  | 0.74  |
|     | E5              | -6.89                                       | -3.24  | -1.87  | -0.99  | -0.42  | -0.03  | 0.26   | 0.53   | 0.82   | 1.23   | 3.81  |
| Sep | MO              | -25.79                                      | -19.55 | -16.61 | -14.52 | -12.94 | -11.33 | -9.69  | -8.01  | -6.10  | -3.88  | -1.64 |
|     | CA              | -18.21                                      | -13.60 | -11.57 | -10.16 | -8.95  | -7.84  | -6.74  | -5.61  | -4.38  | -2.84  | -0.91 |
|     | E5              | -19.42                                      | -14.91 | -12.76 | -11.32 | -10.09 | -9.00  | -7.96  | -6.89  | -5.58  | -3.96  | -1.30 |
| Oct | MO              | -35.05                                      | -28.66 | -25.40 | -22.75 | -20.21 | -17.81 | -15.46 | -13.14 | -10.49 | -6.96  | -2.66 |
|     | CA              | -27.77                                      | -22.07 | -19.51 | -17.52 | -15.79 | -14.16 | -12.49 | -10.72 | -8.74  | -6.10  | -2.06 |
|     | E5              | -27.21                                      | -22.06 | -19.57 | -17.69 | -16.07 | -14.63 | -13.16 | -11.54 | -9.55  | -6.77  | -2.38 |
| Nov | MO              | -40.89                                      | -33.62 | -30.14 | -27.21 | -24.45 | -21.83 | -19.22 | -16.46 | -13.45 | -9.57  | -3.21 |
|     | CA              | -34.85                                      | -27.51 | -24.42 | -22.25 | -20.38 | -18.60 | -16.74 | -14.59 | -12.01 | -8.68  | -2.77 |
|     | E5              | -31.57                                      | -26.49 | -23.57 | -21.47 | -19.55 | -17.71 | -15.84 | -13.87 | -11.53 | -8.29  | -2.96 |
| Dec | MO              | -43.52                                      | -36.01 | -32.14 | -28.87 | -25.95 | -23.30 | -20.64 | -17.99 | -14.99 | -10.89 | -3.66 |
|     | CA              | -39.40                                      | -31.03 | -27.71 | -25.41 | -23.37 | -21.38 | -19.21 | -16.71 | -13.76 | -9.77  | -3.06 |
|     | E5              | -34.26                                      | -28.53 | -25.62 | -23.40 | -21.44 | -19.55 | -17.62 | -15.41 | -12.75 | -9.01  | -3.10 |

<sup>1</sup>) MODIS sea ice surface temperature product

<sup>2</sup>) CARRA reanalysis

<sup>3</sup>) ERA5 reanalysis

Table S2: Same as Table S1 but for the eastern CARRA model domain.

| $q$ | Ice surface temperature quantile $Q_q$ , °C |        |        |        |        |        |        |        |        |        |       |       |
|-----|---------------------------------------------|--------|--------|--------|--------|--------|--------|--------|--------|--------|-------|-------|
|     | 0.01                                        | 0.1    | 0.2    | 0.3    | 0.4    | 0.5    | 0.6    | 0.7    | 0.8    | 0.9    | 0.99  |       |
| Jan | MO                                          | -40.33 | -33.80 | -30.60 | -27.74 | -25.36 | -23.05 | -20.47 | -17.48 | -14.05 | -9.59 | -3.08 |
|     | CA                                          | -39.28 | -34.07 | -30.66 | -27.64 | -24.92 | -22.06 | -19.25 | -16.24 | -12.67 | -8.29 | -2.44 |
|     | E5                                          | -32.94 | -28.45 | -26.05 | -23.83 | -21.40 | -18.84 | -16.22 | -13.47 | -10.42 | -6.92 | -2.36 |
| Feb | MO                                          | -39.94 | -33.67 | -30.41 | -27.60 | -25.10 | -22.53 | -19.60 | -16.30 | -12.70 | -8.22 | -2.82 |
|     | CA                                          | -39.86 | -33.96 | -30.29 | -27.29 | -24.49 | -21.66 | -18.73 | -15.56 | -11.97 | -7.56 | -2.02 |
|     | E5                                          | -32.94 | -28.13 | -25.61 | -23.26 | -20.83 | -18.10 | -15.37 | -12.69 | -9.85  | -6.55 | -2.22 |
| Mar | MO                                          | -39.36 | -32.48 | -29.22 | -26.46 | -24.04 | -21.52 | -18.81 | -15.86 | -12.52 | -8.18 | -2.47 |
|     | CA                                          | -39.72 | -32.99 | -29.12 | -26.11 | -23.46 | -20.98 | -18.46 | -15.60 | -12.29 | -8.08 | -2.10 |
|     | E5                                          | -31.41 | -26.60 | -24.11 | -21.96 | -19.83 | -17.53 | -15.25 | -12.79 | -10.00 | -6.71 | -2.26 |
| Apr | MO                                          | -33.31 | -25.62 | -22.35 | -20.02 | -18.05 | -16.14 | -14.11 | -11.94 | -9.15  | -5.65 | -1.69 |
|     | CA                                          | -32.28 | -24.83 | -21.58 | -19.31 | -17.44 | -15.69 | -13.83 | -11.68 | -9.03  | -5.83 | -0.76 |
|     | E5                                          | -26.03 | -20.05 | -17.45 | -15.54 | -13.95 | -12.52 | -11.08 | -9.44  | -7.46  | -5.06 | -1.22 |
| May | MO                                          | -21.23 | -15.92 | -13.42 | -11.59 | -9.93  | -8.43  | -7.00  | -5.55  | -4.07  | -2.66 | -0.74 |
|     | CA                                          | -19.74 | -14.41 | -11.95 | -10.19 | -8.69  | -7.31  | -5.98  | -4.63  | -3.16  | -1.56 | -0.05 |
|     | E5                                          | -14.43 | -10.64 | -9.01  | -7.78  | -6.68  | -5.64  | -4.67  | -3.69  | -2.69  | -1.51 | 0.54  |
| Jun | MO                                          | -10.41 | -6.34  | -4.57  | -3.48  | -2.75  | -2.21  | -1.79  | -1.40  | -1.03  | -0.65 | -0.25 |
|     | CA                                          | -6.60  | -2.65  | -1.42  | -0.91  | -0.64  | -0.45  | -0.31  | -0.20  | -0.12  | -0.02 | 0.59  |
|     | E5                                          | -3.39  | -1.64  | -1.03  | -0.64  | -0.34  | -0.08  | 0.17   | 0.42   | 0.74   | 1.16  | 2.10  |
| Jul | MO                                          | -6.03  | -2.89  | -2.05  | -1.59  | -1.26  | -1.01  | -0.82  | -0.65  | -0.50  | -0.35 | -0.18 |
|     | CA                                          | -1.61  | -0.97  | -0.72  | -0.55  | -0.43  | -0.34  | -0.27  | -0.21  | -0.16  | 0.08  | 0.93  |
|     | E5                                          | -1.47  | -0.69  | -0.37  | -0.12  | 0.09   | 0.29   | 0.49   | 0.72   | 1.00   | 1.36  | 2.29  |
| Aug | MO                                          | -15.74 | -7.68  | -5.60  | -4.20  | -3.25  | -2.59  | -2.10  | -1.67  | -1.25  | -0.81 | -0.29 |
|     | CA                                          | -7.07  | -3.79  | -2.26  | -1.70  | -1.38  | -1.15  | -0.90  | -0.60  | -0.40  | -0.26 | 0.48  |
|     | E5                                          | -5.72  | -3.17  | -2.12  | -1.46  | -0.99  | -0.65  | -0.37  | -0.09  | 0.21   | 0.61  | 1.35  |
| Sep | MO                                          | -22.34 | -16.29 | -13.95 | -12.52 | -11.19 | -9.94  | -8.65  | -7.27  | -5.76  | -4.00 | -2.02 |
|     | CA                                          | -14.63 | -11.49 | -9.68  | -8.32  | -7.23  | -6.22  | -5.27  | -4.32  | -3.32  | -2.22 | -0.60 |
|     | E5                                          | -13.43 | -10.12 | -8.67  | -7.75  | -6.97  | -6.14  | -5.30  | -4.44  | -3.58  | -2.54 | -0.77 |
| Oct | MO                                          | -30.15 | -24.57 | -21.84 | -19.59 | -17.58 | -15.59 | -13.68 | -11.86 | -9.64  | -6.59 | -2.37 |
|     | CA                                          | -23.50 | -18.14 | -15.87 | -14.22 | -12.75 | -11.41 | -10.04 | -8.60  | -6.91  | -4.66 | -1.35 |
|     | E5                                          | -20.56 | -16.33 | -14.32 | -12.85 | -11.55 | -10.37 | -9.11  | -7.77  | -6.26  | -4.38 | -1.59 |
| Nov | MO                                          | -36.63 | -30.58 | -27.55 | -25.01 | -22.63 | -20.38 | -18.18 | -15.81 | -13.05 | -9.00 | -2.94 |
|     | CA                                          | -32.93 | -26.11 | -22.89 | -20.56 | -18.67 | -16.80 | -14.93 | -12.87 | -10.34 | -7.04 | -2.18 |
|     | E5                                          | -28.95 | -23.29 | -20.44 | -18.32 | -16.43 | -14.71 | -12.98 | -11.12 | -8.78  | -5.92 | -2.03 |
| Dec | MO                                          | -39.37 | -31.69 | -28.00 | -25.31 | -23.03 | -20.79 | -18.36 | -15.51 | -12.34 | -8.26 | -3.09 |
|     | CA                                          | -37.43 | -29.51 | -25.89 | -23.10 | -20.81 | -18.58 | -16.16 | -13.46 | -10.53 | -6.96 | -2.33 |
|     | E5                                          | -31.29 | -25.43 | -22.49 | -20.11 | -17.98 | -15.75 | -13.55 | -11.24 | -8.72  | -5.96 | -2.28 |

Table S3: Annual evolution of ice surface temperature errors in CARRA and ERA5 over the four areas of interest presented as monthly values. Scores are computed against the MODIS ice surface temperature product for the period from 2000 to 2020.

| $q$                 | Ice surface temperature error quantile $Q_q$ , °C |       |       |       |       |       |       |       |      |      |
|---------------------|---------------------------------------------------|-------|-------|-------|-------|-------|-------|-------|------|------|
|                     | CARRA                                             |       |       |       |       | ERA5  |       |       |      |      |
|                     | 0.05                                              | 0.25  | 0.5   | 0.75  | 0.95  | 0.05  | 0.25  | 0.5   | 0.75 | 0.95 |
| Zone A <sup>1</sup> |                                                   |       |       |       |       |       |       |       |      |      |
| Jan                 | -2.71                                             | -2.05 | -1.39 | -0.74 | -0.21 | 0.20  | 0.76  | 1.23  | 2.12 | 2.78 |
| Feb                 | -3.34                                             | -2.24 | -1.56 | -1.01 | -0.27 | 0.42  | 1.27  | 1.74  | 2.36 | 3.13 |
| Mar                 | -2.05                                             | -1.40 | -0.91 | -0.30 | 0.62  | 0.94  | 1.68  | 2.11  | 2.52 | 3.15 |
| Apr                 | -0.38                                             | 0.11  | 0.51  | 1.03  | 1.74  | 1.59  | 2.05  | 2.34  | 2.88 | 3.56 |
| May                 | 0.92                                              | 1.16  | 1.38  | 1.53  | 2.09  | 1.74  | 2.22  | 2.45  | 2.80 | 3.18 |
| Jun                 | 0.82                                              | 0.98  | 1.20  | 1.31  | 1.57  | 1.75  | 1.95  | 2.14  | 2.38 | 2.59 |
| Jul                 | 0.60                                              | 0.82  | 0.94  | 1.13  | 1.33  | 1.69  | 2.00  | 2.30  | 2.55 | 2.83 |
| Aug                 | 0.86                                              | 1.11  | 1.40  | 1.63  | 2.15  | -0.45 | 0.34  | 0.86  | 1.29 | 2.28 |
| Sep                 | 1.21                                              | 1.62  | 1.97  | 2.54  | 3.25  | -1.86 | -0.77 | -0.11 | 0.72 | 2.00 |
| Oct                 | 0.86                                              | 1.35  | 1.66  | 1.99  | 2.33  | 0.28  | 0.86  | 1.16  | 1.42 | 2.16 |
| Nov                 | -0.52                                             | -0.06 | 0.44  | 0.96  | 1.33  | 0.77  | 1.20  | 1.54  | 1.80 | 2.27 |
| Dec                 | -1.68                                             | -0.99 | -0.61 | -0.08 | 0.38  | 0.70  | 1.08  | 1.45  | 1.88 | 2.96 |
| Zone B <sup>2</sup> |                                                   |       |       |       |       |       |       |       |      |      |
| Jan                 | 0.86                                              | 1.88  | 2.47  | 3.48  | 4.10  | 4.15  | 4.75  | 5.24  | 5.62 | 6.15 |
| Feb                 | 0.29                                              | 1.24  | 2.06  | 2.84  | 3.29  | 3.52  | 4.26  | 4.73  | 5.27 | 5.80 |
| Mar                 | -0.40                                             | 0.37  | 1.35  | 2.26  | 2.66  | 2.93  | 3.50  | 3.96  | 4.57 | 4.92 |
| Apr                 | 0.37                                              | 0.85  | 1.23  | 1.90  | 2.38  | 2.35  | 2.81  | 3.14  | 3.43 | 3.89 |
| May                 | 0.90                                              | 1.38  | 1.52  | 1.80  | 2.17  | 2.01  | 2.24  | 2.52  | 2.75 | 3.00 |
| Jun                 | 0.74                                              | 1.04  | 1.27  | 1.46  | 1.62  | 1.48  | 1.63  | 1.85  | 2.12 | 2.42 |
| Jul                 | 0.55                                              | 0.77  | 0.94  | 1.19  | 1.41  | 1.16  | 1.34  | 1.46  | 1.60 | 1.83 |
| Aug                 | 1.38                                              | 1.64  | 1.83  | 2.21  | 2.54  | 0.62  | 1.06  | 1.49  | 1.78 | 2.17 |
| Sep                 | 1.86                                              | 2.45  | 2.70  | 3.06  | 3.54  | 0.70  | 1.40  | 2.01  | 2.41 | 3.18 |
| Oct                 | 2.22                                              | 2.99  | 3.35  | 3.78  | 4.59  | 2.52  | 3.15  | 3.60  | 4.22 | 5.38 |
| Nov                 | 2.44                                              | 3.02  | 3.48  | 4.25  | 5.28  | 3.08  | 4.39  | 4.96  | 5.49 | 6.35 |
| Dec                 | 2.04                                              | 2.64  | 3.06  | 4.12  | 5.10  | 3.76  | 5.03  | 5.55  | 5.98 | 6.61 |
| Zone C <sup>3</sup> |                                                   |       |       |       |       |       |       |       |      |      |
| Jan                 | -1.30                                             | -0.82 | -0.24 | 0.29  | 1.20  | 1.45  | 2.34  | 2.94  | 3.42 | 3.89 |
| Feb                 | -1.14                                             | -0.77 | -0.51 | 0.08  | 0.76  | 1.69  | 2.41  | 2.85  | 3.49 | 4.06 |
| Mar                 | -1.15                                             | -0.61 | -0.40 | 0.21  | 0.53  | 1.38  | 2.28  | 2.77  | 3.05 | 4.11 |
| Apr                 | -0.40                                             | 0.05  | 0.28  | 0.54  | 1.05  | 1.60  | 2.22  | 2.47  | 2.85 | 3.28 |
| May                 | 0.79                                              | 0.93  | 1.08  | 1.24  | 1.52  | 1.81  | 1.96  | 2.19  | 2.39 | 2.96 |
| Jun                 | 0.82                                              | 1.00  | 1.12  | 1.27  | 1.50  | 1.36  | 1.55  | 1.70  | 1.83 | 2.06 |
| Jul                 | 0.79                                              | 0.99  | 1.25  | 1.58  | 2.16  | 1.14  | 1.44  | 1.73  | 2.15 | 2.51 |
| Aug                 | 0.01                                              | 1.69  | 2.34  | 2.99  | 3.61  | 0.80  | 1.87  | 2.58  | 3.21 | 4.05 |
| Sep                 | -0.76                                             | 2.34  | 3.34  | 4.41  | 5.49  | 0.56  | 2.42  | 4.04  | 4.97 | 6.59 |
| Oct                 | 1.04                                              | 2.20  | 2.75  | 3.53  | 5.50  | 2.16  | 3.27  | 4.23  | 5.17 | 7.13 |
| Nov                 | 0.35                                              | 0.84  | 1.33  | 2.03  | 3.24  | 2.13  | 3.06  | 3.55  | 3.98 | 4.47 |
| Dec                 | -0.90                                             | -0.35 | 0.69  | 1.18  | 2.04  | 2.02  | 2.65  | 3.12  | 3.77 | 4.27 |
| Zone D <sup>4</sup> |                                                   |       |       |       |       |       |       |       |      |      |
| Jan                 | 0.86                                              | 2.07  | 2.85  | 4.48  | 6.42  | 5.23  | 5.85  | 6.35  | 7.51 | 8.16 |
| Feb                 | 0.11                                              | 1.81  | 2.85  | 4.57  | 5.39  | 4.86  | 5.96  | 6.61  | 7.55 | 8.59 |
| Mar                 | 0.80                                              | 1.77  | 2.64  | 3.86  | 4.49  | 4.53  | 5.67  | 6.26  | 7.04 | 7.63 |
| Apr                 | 1.44                                              | 2.03  | 2.65  | 3.32  | 3.92  | 4.62  | 5.03  | 5.33  | 5.70 | 6.24 |
| May                 | 1.74                                              | 2.33  | 2.70  | 3.11  | 3.71  | 3.76  | 4.09  | 4.46  | 4.84 | 5.61 |
| Jun                 | 1.11                                              | 1.39  | 1.58  | 2.07  | 2.30  | 2.52  | 2.76  | 3.08  | 3.44 | 3.92 |
| Jul                 | 0.89                                              | 1.07  | 1.23  | 1.48  | 2.05  | 2.10  | 2.33  | 2.55  | 2.86 | 3.42 |
| Aug                 | 2.32                                              | 2.76  | 3.13  | 3.45  | 3.87  | 2.38  | 3.01  | 3.54  | 3.98 | 4.82 |
| Sep                 | 4.02                                              | 4.42  | 4.76  | 5.06  | 5.58  | 3.60  | 4.48  | 5.21  | 6.03 | 6.67 |
| Oct                 | 3.80                                              | 4.63  | 5.37  | 5.82  | 6.42  | 5.17  | 6.10  | 6.76  | 7.66 | 8.30 |
| Nov                 | 2.75                                              | 3.73  | 4.45  | 5.68  | 7.47  | 5.01  | 6.29  | 6.92  | 7.78 | 9.03 |
| Dec                 | 1.43                                              | 2.92  | 3.66  | 5.11  | 7.75  | 5.10  | 5.77  | 6.80  | 7.79 | 8.85 |

- 1) Baffin Bay (including the Nares Strait), Davis Strait  
2) Greenland Sea, North Atlantic Ocean  
3) Barents Sea, Kara Sea, White Sea  
4) central Arctic

Table S4: Annual evolution of ice thickness errors in CARRA and ERA5 over the four areas of interest presented as monthly values. Scores are computed against the CryoSat-2/SMOS merged ice thickness product for the period from 2010 to 2020.

| $q$                 | Ice thickness error quantile $Q_q$ , °C |       |       |       |       |       |       |       |       |       |
|---------------------|-----------------------------------------|-------|-------|-------|-------|-------|-------|-------|-------|-------|
|                     | CARRA                                   |       |       |       |       | ERA5  |       |       |       |       |
|                     | 0.05                                    | 0.25  | 0.5   | 0.75  | 0.95  | 0.05  | 0.25  | 0.5   | 0.75  | 0.95  |
| Zone A <sup>1</sup> |                                         |       |       |       |       |       |       |       |       |       |
| Oct                 | -0.10                                   | -0.04 | 0.07  | 0.14  | 0.30  | 1.09  | 1.16  | 1.21  | 1.23  | 1.26  |
| Nov                 | 0.09                                    | 0.14  | 0.20  | 0.23  | 0.33  | 1.12  | 1.16  | 1.19  | 1.24  | 1.26  |
| Dec                 | 0.04                                    | 0.09  | 0.13  | 0.18  | 0.32  | 0.88  | 0.92  | 0.96  | 1.02  | 1.06  |
| Jan                 | 0.05                                    | 0.10  | 0.18  | 0.24  | 0.40  | 0.72  | 0.76  | 0.80  | 0.84  | 0.91  |
| Feb                 | 0.16                                    | 0.21  | 0.29  | 0.38  | 0.52  | 0.64  | 0.72  | 0.76  | 0.81  | 0.84  |
| Mar                 | 0.22                                    | 0.38  | 0.45  | 0.51  | 0.64  | 0.63  | 0.71  | 0.75  | 0.81  | 0.85  |
| Apr                 | 0.36                                    | 0.50  | 0.57  | 0.67  | 0.79  | 0.63  | 0.74  | 0.81  | 0.86  | 0.92  |
| Zone B <sup>2</sup> |                                         |       |       |       |       |       |       |       |       |       |
| Oct                 | -0.95                                   | -0.83 | -0.50 | -0.45 | -0.38 | 0.16  | 0.32  | 0.52  | 0.63  | 0.69  |
| Nov                 | -1.04                                   | -0.79 | -0.60 | -0.48 | -0.30 | -0.04 | 0.24  | 0.35  | 0.47  | 0.61  |
| Dec                 | -1.34                                   | -0.83 | -0.59 | -0.47 | -0.39 | -0.40 | 0.00  | 0.20  | 0.33  | 0.48  |
| Jan                 | -1.39                                   | -1.09 | -0.88 | -0.65 | -0.52 | -0.62 | -0.39 | -0.17 | 0.02  | 0.26  |
| Feb                 | -1.33                                   | -1.09 | -0.77 | -0.54 | -0.40 | -0.58 | -0.41 | -0.17 | 0.05  | 0.30  |
| Mar                 | -1.30                                   | -0.97 | -0.62 | -0.42 | -0.30 | -0.58 | -0.33 | -0.08 | 0.13  | 0.22  |
| Apr                 | -1.23                                   | -0.74 | -0.52 | -0.36 | -0.23 | -0.55 | -0.20 | -0.06 | 0.18  | 0.28  |
| Zone C <sup>3</sup> |                                         |       |       |       |       |       |       |       |       |       |
| Oct                 | -0.19                                   | 0.04  | 0.17  | 0.26  | 0.41  | 1.07  | 1.30  | 1.36  | 1.40  | 1.41  |
| Nov                 | 0.10                                    | 0.19  | 0.27  | 0.33  | 0.41  | 1.17  | 1.30  | 1.34  | 1.38  | 1.41  |
| Dec                 | 0.12                                    | 0.21  | 0.28  | 0.35  | 0.42  | 0.99  | 1.08  | 1.20  | 1.28  | 1.32  |
| Jan                 | 0.03                                    | 0.18  | 0.29  | 0.36  | 0.45  | 0.78  | 0.87  | 1.04  | 1.15  | 1.26  |
| Feb                 | 0.15                                    | 0.29  | 0.38  | 0.46  | 0.54  | 0.75  | 0.90  | 1.05  | 1.12  | 1.19  |
| Mar                 | 0.15                                    | 0.31  | 0.43  | 0.51  | 0.60  | 0.77  | 0.87  | 0.94  | 1.04  | 1.17  |
| Apr                 | 0.20                                    | 0.38  | 0.53  | 0.59  | 0.64  | 0.82  | 0.87  | 0.94  | 1.07  | 1.18  |
| Zone D <sup>4</sup> |                                         |       |       |       |       |       |       |       |       |       |
| Oct                 | -1.28                                   | -0.97 | -0.77 | -0.72 | -0.60 | -0.44 | -0.28 | -0.05 | 0.17  | 0.26  |
| Nov                 | -1.33                                   | -1.00 | -0.89 | -0.79 | -0.67 | -0.62 | -0.46 | -0.21 | -0.01 | 0.09  |
| Dec                 | -1.19                                   | -0.89 | -0.77 | -0.70 | -0.62 | -0.60 | -0.52 | -0.31 | -0.10 | 0.01  |
| Jan                 | -1.06                                   | -0.89 | -0.78 | -0.71 | -0.64 | -0.67 | -0.57 | -0.45 | -0.35 | -0.25 |
| Feb                 | -1.10                                   | -0.90 | -0.80 | -0.69 | -0.54 | -0.79 | -0.69 | -0.60 | -0.50 | -0.25 |
| Mar                 | -1.21                                   | -1.04 | -0.96 | -0.81 | -0.60 | -1.08 | -0.95 | -0.87 | -0.66 | -0.43 |
| Apr                 | -1.25                                   | -1.14 | -1.05 | -0.85 | -0.64 | -1.21 | -1.13 | -1.03 | -0.73 | -0.56 |

<sup>1)</sup> Baffin Bay (including the Nares Strait), Davis Strait

<sup>2)</sup> Greenland Sea, North Atlantic Ocean

<sup>3)</sup> Barents Sea, Kara Sea, White Sea

<sup>4)</sup> central Arctic

Table S5: Representation of the sea ice evolution is the CARRA reanalysis product as compared to the ice mass balance buoy observations. Mean values of snow depth (Hs), ice thickness (Hi), surface and snow-ice interface temperatures (Ts and Tin, respectively) are provided for buoy and reanalysis data, as well as computed correlation coefficients between the observed and modelled values.

|       | Inside CARRA domains |                   |                 |                 | Mean Hs, m      |                 |                    |      | Mean Hi, m |       |       |      | Mean Ts, °C |       |    |      | Mean Tin, °C |    |      |  |
|-------|----------------------|-------------------|-----------------|-----------------|-----------------|-----------------|--------------------|------|------------|-------|-------|------|-------------|-------|----|------|--------------|----|------|--|
|       | Time period          | Days <sup>1</sup> | Ob <sup>2</sup> | Re <sup>3</sup> | Ob <sup>2</sup> | Re <sup>3</sup> | r <sup>4</sup> , % | Ob   | Re         | r, %  | Ob    | Re   | r, %        | Ob    | Re | r, % | Ob           | Re | r, % |  |
| CREEL | 2010A                | 17 Sep - 15 Nov   | 60              | 0.35            | 0.16            | 90              | 1.34               | 0.67 | 14         | -14.3 | -13.9 | 85   | -2.8        | -6.8  | 74 |      |              |    |      |  |
|       | 2012D                | 29 Jun - 23 Oct   | 117             | 0.29            | 0.05            | 79              | 1.22               | 1.15 | 88         | -     | -     | -    | -           | -     | -  | -    | -            | -  | -    |  |
|       | 2013B <sup>e</sup>   | 29 Nov - 12 Dec   | 14              | 0.12            | 0.11            | -82             | 1.58               | 0.91 | -12        | -     | -     | -    | -           | -     | -  | -    | -            | -  | -    |  |
|       | 2013B <sup>w</sup>   | 21 Sep - 12 Dec   | 83              | 0.17            | 0.13            | -12             | 1.59               | 1.08 | -5         | -20.0 | -16.8 | 82   | -19.4       | -9.6  | 73 |      |              |    |      |  |
|       | 2015D                | 5 Sep - 24 Nov    | 81              | 0.50            | 0.18            | 89              | 1.02               | 0.66 | -72        | -     | -     | -    | -           | -     | -  | -    | -            | -  | -    |  |
| 2015E | 23 May - 5 Jul       | 44                | 0.21            | 0.31            | 69              | 0.89            | 1.01               | 92   | -0.4       | -1.3  | 80    | -1.5 | -1.2        | 84    |    |      |              |    |      |  |
| SIMBA | FMI0601              | 9 May - 17 May    | 8               | 0.22            | 0.42            | -65             | 2.20               | 1.68 | -1         | -6.7  | -6.8  | 95   | -6.4        | -5.5  | 98 |      |              |    |      |  |
|       | FMI0602              | 8 May - 17 May    | 8               | 0.09            | 0.43            | 92              | 1.32               | 1.67 | 57         | -6.9  | -7.2  | 83   | -7.1        | -5.7  | 95 |      |              |    |      |  |
|       | FMI0603              | 8 May - 17 May    | 9               | 0.15            | 0.44            | -84             | 1.85               | 1.66 | 70         | -7.3  | -7.4  | 95   | -6.6        | -5.7  | 90 |      |              |    |      |  |
|       | PRIC0901             | 10 May - 17 May   | 7               | 0.20            | 0.43            | -78             | 1.74               | 1.67 | 1          | -5.9  | -6.4  | 95   | -5.7        | -5.6  | 96 |      |              |    |      |  |
|       | PRIC0902             | 10 May - 15 May   | 5               | 0.25            | 0.41            | 86              | 1.88               | 1.68 | -94        | -5.4  | -7.2  | 94   | -6.3        | -6.1  | 97 |      |              |    |      |  |
|       | PRIC0903             | 23 Apr - 17 May   | 24              | 0.24            | 0.27            | -61             | 2.28               | 1.85 | 14         | -10.9 | -9.8  | 87   | -8.9        | -7.2  | 69 |      |              |    |      |  |
|       | PRIC0904             | 10 May - 17 May   | 6               | 0.30            | 0.42            | -64             | 1.74               | 1.68 | -22        | -5.0  | -5.3  | 90   | -6.1        | -5.4  | 98 |      |              |    |      |  |
|       | PRIC0905             | 10 May - 17 May   | 7               | 0.12            | 0.44            | -92             | 1.62               | 1.66 | -74        | -5.8  | -6.2  | 95   | -5.7        | -5.5  | 94 |      |              |    |      |  |
|       | PRIC0906             | 10 May - 17 May   | 7               | 0.22            | 0.43            | -21             | 2.05               | 1.68 | -89        | -5.8  | -5.9  | 94   | -5.9        | -5.5  | 97 |      |              |    |      |  |
|       | FMI02                | 9 Apr - 5 Jul     | 88              | 0.26            | 0.39            | 76              | 2.08               | 1.65 | -22        | -9.6  | -9.2  | 97   | -5.6        | -5.4  | 98 |      |              |    |      |  |
| NICE  | FMI0606              | 3 Nov - 11 Apr    | 159             | 0.46            | 0.69            | 98              | 0.89               | 0.58 | 97         | -17.6 | -17.7 | 81   | -6.9        | -4.4  | 80 |      |              |    |      |  |
|       | 2015A <sup>e</sup>   | 20 Jan - 16 Mar   | 55              | 0.53            | 0.23            | 62              | 1.24               | 1.09 | 25         | -21.7 | -21.2 | 92   | -13.7       | -13.2 | 65 |      |              |    |      |  |
|       | 2015A <sup>w</sup>   | 20 Jan - 16 Mar   | 55              | 0.53            | 0.20            | 41              | 1.24               | 1.06 | 56         | -20.4 | -20.2 | 89   | -8.5        | -13.4 | 63 |      |              |    |      |  |
|       | 2015D <sup>e</sup>   | 7 Mar - 25 Apr    | 49              | 0.42            | 0.42            | -5              | 1.27               | 1.32 | -40        | -16.6 | -17.4 | 94   | -8.1        | -8.4  | 73 |      |              |    |      |  |
|       | 2015D <sup>w</sup>   | 7 Mar - 25 Apr    | 49              | 0.42            | 0.39            | -39             | 1.27               | 1.30 | -43        | -17.3 | -16.9 | 93   | -8.3        | -8.3  | 72 |      |              |    |      |  |

1) total duration, in days, of the buoy drift within a CARRA model domain

2) observed value

3) modelled value in the CARRA reanalysis product

4) correlation coefficient between the observational series and reanalysis data

e) part of the trajectory inside the eastern CARRA domain

w) part of the trajectory inside the western CARRA domain

Table S6: Data access links for the MOSAiC ice mass balance buoys used in the present study.

| Buoy ID  | DOI                                                                                         |
|----------|---------------------------------------------------------------------------------------------|
| FMI0601  | <a href="https://doi.org/10.1594/PANGAEA.940650">https://doi.org/10.1594/PANGAEA.940650</a> |
| FMI0602  | <a href="https://doi.org/10.1594/PANGAEA.938096">https://doi.org/10.1594/PANGAEA.938096</a> |
| FMI0603  | <a href="https://doi.org/10.1594/PANGAEA.940659">https://doi.org/10.1594/PANGAEA.940659</a> |
| PRIC0901 | <a href="https://doi.org/10.1594/PANGAEA.940231">https://doi.org/10.1594/PANGAEA.940231</a> |
| PRIC0902 | <a href="https://doi.org/10.1594/PANGAEA.940593">https://doi.org/10.1594/PANGAEA.940593</a> |
| PRIC0903 | <a href="https://doi.org/10.1594/PANGAEA.940617">https://doi.org/10.1594/PANGAEA.940617</a> |
| PRIC0904 | <a href="https://doi.org/10.1594/PANGAEA.940634">https://doi.org/10.1594/PANGAEA.940634</a> |
| PRIC0905 | <a href="https://doi.org/10.1594/PANGAEA.938134">https://doi.org/10.1594/PANGAEA.938134</a> |
| PRIC0906 | <a href="https://doi.org/10.1594/PANGAEA.938128">https://doi.org/10.1594/PANGAEA.938128</a> |
